## Utilization of extended donor criteria in liver transplantation: a comprehensive review of the literature

Arash Nickkholgh<sup>1</sup>, Jürgen Weitz<sup>1</sup>, Jens Encke<sup>2</sup>, Peter Sauer<sup>2</sup>, Arianeb Mehrabi<sup>1</sup>, Markus W. Büchler<sup>1</sup>, Jan Schmidt<sup>1</sup> and Peter Schemmer<sup>1</sup>

<sup>1</sup>Department of General Surgery and <sup>2</sup>Department of Gastroenterology, Ruprecht-Karls-University, Heidelberg, Germany

### Abstract

Organ shortage has driven many transplant programs to extend their criteria to accept donors. The goal of the present work is to further characterize the most important extended donor criteria (EDC) in liver transplantation and to identify factors that impact outcomes for this type of grafts through a comprehensive review of the most recent findings and current opinions. Age, steatosis, positive viral hepatitis serology, intensive care unit stay, and history of malignancy in donor have been the matter of substantial debate in recent years and are therefore discussed in further detail here. Cold and warm ischemic times have also been discussed separately as they have been identified as important independent risk factors for mortality. The use of grafts with EDC provides an immediate expansion of the donor pool. However, in order to optimize effective utilization of EDC, attempts should be made to carefully match the most appropriate graft-recipient pair.

**Keywords:** liver transplantation; extended donor criteria; graft survival; patient survival; donor age; steatosis; hepatitis; malignancy; ischemia time

### Introduction

The gap between the number of available organs and the number of patients waiting for liver transplantation has continued to widen over the past decade, with an increasing individual waiting time and patients dying on the waiting list before transplantation [1]. Organ shortage has led many transplant centres to pursue strategies to increase the donor pool including the use of living donors, split livers, and domino transplants, as well as to extend the criteria for organ acceptance.

The concept of accepting extended donor criteria (EDC) for liver transplantation becomes better characterized. The Bundesärztekammer [German Medical Association] has identified the following donor characteristics as EDC: age >65 years, intensive care unit (ICU) stay and ventilation support >7 days, body mass index (BMI) >30, biopsy proven steatosis >40%, peak serum Sodium >165 mmol/l, alanine aminotransferase (ALT) or aspartate aminotransferase (AST) >3×normal, serum total bilirubin >3 mg/dl, positive serology for viral hepatitis (hepatitis B virus (HBV) surface antigen -HBsAg-, hepatitis B virus core antibody -antiHBc-, or hepatitis C virus (HCV) antibody -anti HCV-positivity), sepsis with positive blood culture, meningitis, history of extrahepatic malignancy, and previous drug abuse [2]. These factors have been presumed to increase the risk of initial graft dysfunction [3,4], and their combination is thought to be additive on graft injury (Figure 1) [5–7]. However, there have been attempts to evaluate the actual degree of risk that EDC grafts may impart to a recipient, to adopt adequate measures to maintain good graft and patient results, and to establish the exact cut-off point for the acceptance of such grafts in order to identify the already existing absolute risk factors for poor graft function. The aim of the present work has been to further characterize the most important EDC through a comprehensive literature review, to address the actual risks that EDC pose to graft function, and to introduce the pre-emptive measures to eliminate the risks of EDC when possible.

Donor characteristics that are considered to be potentially more detrimental for transplantation outcome have changed over time. Recent multivariate analyses of large national and single centre series have failed to demonstrate factors such as donor female sex, obesity, elevated liver function tests, hypotension/increased pressor use, and hypernatremia as independent risk factors for poorer outcome [8–10]. However, there are some specific EDC that need especial considerations in order to maintain

*Correspondence to:* Prof. Dr. Peter Schemmer, Dept. of General Surgery, Ruprecht-Karls-University, INF 110, 69120 Heidelberg, Germany. Email: Peter\_Schemmer@med.uni-heidelberg.de

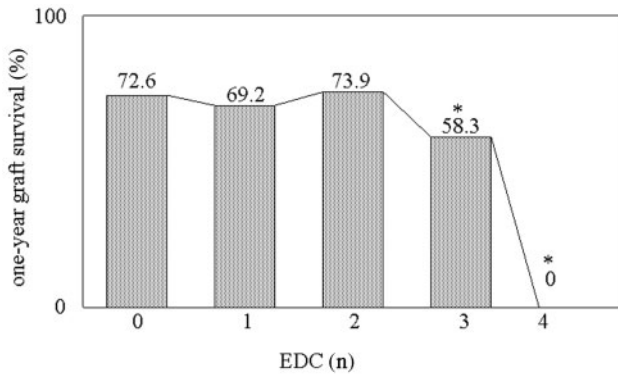

**Fig. 1.** Cumulative effect of extended donor criteria (EDC) on one-year graft survival. Diagram depicting one-year graft survival after transplantation of livers with EDC from 422 consecutive liver donors (1992–2004) in Baden-Württemberg, Germany. Two hundred and twenty eight livers were investigated to have 1, 2, 3, or 4 EDC. Grafts with  $\geq 3$  EDC had significantly lower 1-year post-transplant survival ( $P < 0.05$ ). Graft loss included primary nonfunction, chronic rejection, and recipient's death. All grafts with 4 EDC were lost within 1 year. Modified from Fischer-Fröhlich *et al.*, Deutsche Stiftung Organtransplantation (DSO), Stuttgart, Germany, 2006. \* $P < 0.05$ ; EDC: Extended Donor Criteria.

acceptable outcomes. The following discussion focuses on these more important criteria among all factors identified as EDC.

#### Donor age

Over the last decade, using of cadaveric livers from older donors has been remarkably accelerated. According to the United Network for Organ Sharing (UNOS), the annual number of donors  $>65$  years has been increased about 14-fold from 1991 to 2001 [11]. Within the same time period, the European Liver Transplant Registry (ELTR) has reported an increasing percentage of donors  $\geq 60$  years from 2% to 20% [12], as well as doubling the median donor age from 25 to 50 years [13]. This donor category has been identified as the most important factor to increase the number of cadaveric liver transplantations [14].

Physiological and morphological studies suggest that, compared to other organs, the liver seems to age slowly. Routine liver function tests do not show age-associated changes and even the synthesis rate and concentration of albumin seems to be stable into old age. Hepatic flow decreases about 35%–40% and bile flow about 50%, reflecting at least in part, impairment of energy-dependent and microtubule-dependent transport processes. The cytochrome P450 content of liver specimens is recently reported to decline from the age of 40 to 69 years by 16% and further decline by 32% after age 70 [15]. Ultrastructural changes in the aging liver include pseudocapillarization of the sinusoidal endothelium, defenestration with reduced porosity, thickening of the endothelium, infrequent development of basal lamina, and only minor collagen deposits in the space of Disse. These changes may restrict the availability of oxygen and other substances [16].

Furthermore, preperfusion biopsies of livers from donors  $>60$  years show higher rates of moderate to severe microvesicular steatosis compared with those from  $<60$  year-old donors, as well as higher values of bilirubin and prothrombin time [17]. Therefore, older livers may be more susceptible to endothelial cell injury from cold ischemia [18,19], which may be potentiated by the more prevalent steatosis found in livers of the elderly, decreased ATP synthesis after reperfusion, which may decrease regenerative capacity and synthetic function, and delayed function with a notable cholestatic pattern after implantation [20]. A recent study has shown that in the elderly, the liver may not be morphologically smaller, but the hepatocyte volume decreases, i.e., it has fewer larger hepatocytes histologically [21]. This problem may result in a physiologically mismatched graft despite its size being appropriate.

Regarding post-transplant complications and survival, findings are not unanimous in the literature. On one side, old livers have been reported to be more susceptible to rejection episodes, biliary complications [22], increased risk of vascular complications due to arteriosclerosis of the hepatic artery [23], and greater risk of transmission of occult tumours [24,25]. A prospective cross-sectional study of 270 patients with a first functional liver graft at 10 years of follow-up undergoing liver biopsies has identified donor age as a major independent determinant of the long-term histological prognosis of liver grafts [26]. A review of the liver transplantation database of the National Institute of Diabetes and Digestive and Kidney Diseases (NIDDK) has declared the donor age  $>59$  years as one of the three independent clinical characteristics most associated with resource utilization [27]. On the other side, others have observed no significant increase in the incidence of acute rejection, nonischemic biliary stenosis, FK-506 and cyclosporine toxicity, renal failure necessitating dialysis, level of immunosuppressive drugs [20], and intensive care unit or total hospital stay [28]. Regarding increased vascular complications, some argue that even if the celiac axis may be involved with atherosclerosis [29], the hepatic arterial tree is generally spared even in the elderly [30]. Persistently elevated gamma-glutamyl-transpeptidase (GGT), alkaline phosphatase, and total bilirubin have been reported to almost resume to normal values at 12 months after transplantation [28]. Reports on patient and graft survival following transplantation of older donor livers are also highly variable. A review of larger multivariate analyses including older donor age performed after year 2000 shows that while some observed significantly lower short term graft survivals with older livers, others have found significant differences only in longer terms, or no differences at all (Table.1) [10,20,22,28,31,32]. This discrepancy may be, at least in part, due to different selection policies regarding older donor livers at different centres.

The association between the use of older donor livers in recipients with hepatitis C virus (HCV) and

**Table 1.** Multivariate regression analysis on the impact of donor age >60 years

| Author, TPL center, year                 | Cut-off age (CA) | <i>n</i> * |                 | PNF [%]   |     | Graft survival [%] |      |        |     |         |      |         |     |           |        |           |           |           |
|------------------------------------------|------------------|------------|-----------------|-----------|-----|--------------------|------|--------|-----|---------|------|---------|-----|-----------|--------|-----------|-----------|-----------|
|                                          |                  |            |                 |           |     | <1 year            |      | 1 year |     | 2 years |      | 3 years |     | 5 years   |        |           |           |           |
|                                          |                  | >CA        | <CA             | >CA       | <CA | >CA                | <CA  | >CA    | <CA | >CA     | <CA  | >CA     | <CA | >CA       | <CA    |           |           |           |
| Moore <i>et al.</i><br>Vanderbilt 2005   | 60 year          | 35         | 399             |           |     |                    |      |        |     |         |      |         |     |           | 35     | 75        |           |           |
| Neipp <i>et al.</i><br>Hanover 2004      | 60 year          | 67         | 1141            | 12        | ?   |                    |      | 68     | 69  | 65      | 66   |         |     |           | <0.001 | 53        | 60        |           |
| Tector <i>et al.</i><br>Indiana 2006     | 60 year          | 60         | 511             | 3         | 0.2 | 80                 | 91.3 | 67.4   | 84  | 61.5    | 77.6 |         |     |           |        |           | <i>ns</i> |           |
| Markmann <i>et al.</i><br>UCLA 2001      | 65 year          | 56         | 947             |           |     |                    |      | 0.03   |     | 0.03    |      |         |     |           | 62     | 75        |           |           |
| Busquets <i>et al.</i><br>Barcelona 2001 | 70 year          | 21         | 327             | 5         | 2   | 1m: 81             | 89   |        |     |         |      |         |     |           | 0.006  |           | 25        | 59        |
|                                          |                  |            |                 | <i>ns</i> |     | <i>ns</i>          |      | 6m: 56 | 81  |         |      |         |     |           |        |           | <0.001    |           |
| Nardo <i>et al.</i><br>Bologna 2004      | 80 year          | 30         | 60 <sup>‡</sup> | 0         | 2   | 3m: 96.7           | 90   |        |     |         |      | ?       | ?   | ?         | ?      | ?         | ?         | ?         |
|                                          |                  |            |                 | <i>ns</i> |     | <i>ns</i>          |      |        |     |         |      |         |     | <i>ns</i> |        | <i>ns</i> |           | <i>ns</i> |
|                                          |                  |            |                 |           |     | 6m: 90             | 90   |        |     |         |      |         |     |           |        |           |           |           |
|                                          |                  |            |                 |           |     | <i>ns</i>          |      |        |     |         |      |         |     |           |        |           |           |           |

TPL, transplant; CA, cut-off age; PNF, primary nonfunction; yr, year; m, month; U, university; *ns*, not significant.

Survival analysis for donor age > 60 years performed after 2000. \*The patient population above the cut-off age versus the population below the cut-off age. A p value is provided where applicable. †Not provided by authors. There were 2 PNFs within the donor groups of 'older than 60 years' versus 1 PNF in 'standard donors'. The difference seems to be significant. However, this difference may be attributable to long warm and cold ischemia times in the former two PNFs as well. ‡≤40 years old.

lower graft and patient survival has been less debating [33–41]. It is observed that fibrosis is more rapid and cirrhosis is more common in recipients with HCV who receive organs from older donors [33]; donor age ≥60 years has even been proposed as a major contributor to the recent inferior outcome among HCV positive recipients compared to other recipient categories [34]. Moreover, grafts from older HCV positive donors have been reported to cause significantly more advanced fibrosis compared to HCV positive grafts from younger donors [35]. Proposed mechanisms include accelerated decrease of hepatocyte lifespan in viral hepatitis due to hepatocyte telomere shortening [42]. In animal models, the aging liver has been shown to accumulate mitochondrial deletions, thus leading to an inability to cope with the production of reactive oxygen species (ROS) that enhances apoptosis and subsequent fibrosis [43].

Based on the present data, one may find the following as 'guidelines for elderly donor selection' in the literature. These guidelines, however, are sometimes subjective, not universally accepted, or even contradictory and therefore do not allow drawing precise and uniform evidence-based conclusions. These include careful graft selection (that may result in higher percentage of donor livers discarded), including careful donor medical history, blood tests,

a thorough examination of internal organs during harvesting, and histological evaluation of any suspicious mass, and liberal use of liver biopsy to rule out massive steatosis and HCV-related cirrhosis [20] (which contradicts efforts to keep cold ischemia time low). Cold ischemic time should be kept to a minimum [44–46], ideally less than 6 hours [30] through enhanced coordination (such as starting the recipient operation as soon as possible after verification with the harvesting team [47]). Recipients with hepatitis C should not, when feasible, receive grafts from very old donors [20]; although the cut-off age is not clear and includes a range from <60 to 80 years of age (Table.1). If HCV positive recipients receive grafts from older donors, antiviral therapy should be instituted early after liver transplantation [34]. Some investigators recommend matching the graft to the recipient (i.e., marginal grafts for low-risk patients as opposed to replacement in high-risk recipients—e.g., fulminant hepatic failure—) [48].

### Steatosis

Steatosis is increasing in the developed world population and is commonly seen in conjunction with obesity, alcohol use, increased age, and the presence of type 2 diabetes mellitus [49]. There are two histological

patterns of hepatic steatosis: a diffuse small droplet vacuolization (microvesicular steatosis) and a combined pattern of large and small vacuole deposits (macrovesicular steatosis) [50]. The use of grafts with macrovesicular steatosis has been associated with increased rates of initial poor function (IPF), primary nonfunction (PNF), and poorer outcome [51]. Proposed underlying mechanisms include impaired metabolism in the steatotic hepatocytes [52–54], the physical effects of lipid [55,56], particularly during cold ischemia [57], diminished portal blood flow [56, 58], and increased sensitivity to oxidative stress on reperfusion [59–61]. Estimation of steatosis using haematoxylin and eosin (H&E)-stained frozen section liver biopsy has been reported to be difficult and subjective [62,63]. Even Organ Procurement and Transplantation Network (OPTN) data regarding steatosis are recorded in broad ranges and, until recently, did not differentiate between macrovesicular and microvesicular steatosis [8]. Therefore, the reported variability in both the numbers and grading of steatotic donor livers may reflect differences in both qualitative and quantitative evaluations between different centres [64,65]. Some experts believe that physical inspection of an expert in assessing the fat content is equivalent to biopsy [66]; however, this has not yet been validated and remains largely subjective. Body mass index (BMI) per se correlates weakly with presence and severity of steatosis [67]. Imaging studies alone are not proper tools for the accurate quantification of hepatic fat in all donor candidates [68,69]. It has been suggested that differential quantification of colour pixels in Oil Red O (ORO) stained liver biopsies using a computer methodology yields more objective and consistent estimation of liver fat content compared with visual interpretation of H&E stained sections [70], although these computer methods determine the total amount of fat and not the size of the fat droplet (i.e., microvesicular vs. macrovesicular steatosis).

Steatotic livers have been reported to be more susceptible to cold ischemia injury [71,72] and moderate to severe macrovesicular steatosis has been observed as the leading cause of severe liver preservation injury [73]. In one experience with macrovesicular steatotic livers, every additional hour of total ischemia time longer than 10 hours significantly increased the relative risk of graft and patient loss [74]. This highlights the difficult issue of acceptance steatotic livers previously evaluated and refused by other centres, as in these cases ischemia times are always very much longer. Similarly, the additional negative influence of older donor age and hepatic steatosis has been underlined [75]. A large retrospective single-centre study has suggested that recurrent hepatitis C is more common in recipients of moderate and severe steatotic donor livers [76].

Currently, a macrovesicular fat content of 30% in liver graft, a value with a historical basis resting on early nineties' observations, is widely accepted for transplantation [77]. Grafts with moderate

macrovesicular steatosis (30–60%) may be utilized in the absence of additional risk factors in the donor or recipient; livers with more than 60% macrosteatosis should probably be excluded [78]. There are recommendations to allocate livers of different degrees of steatosis based on the Model for End-Stage Liver Disease (MELD) scores of the candidates; these recommendations are however yet to be verified by multivariate analysis [73]. PGE1 has been suggested to be of potential benefit to early allograft function in a steatotic donor liver transplantation model in rats [79]. Only few data is currently available on PGE1 use in human recipients.

### *Hepatitis C*

A mid-1990s review of UNOS registry regarding the clinical outcome of a large series of HCV<sup>+</sup> recipients of HCV<sup>+</sup> liver allografts showed that donor hepatitis C status does not impact on graft or patient survival after liver transplantation for HCV<sup>+</sup> recipients. Their survival was equivalent, if not better, compared with a control group of HCV<sup>+</sup> recipients of HCV<sup>-</sup> livers [80]. Data from other large centres have yielded similar results [81,82]. The time to recurrence and the course of HCV disease as well as vector of means of alanine aminotransferase and total bilirubin parallel that in patients who received noninfected organs in a matched-pair analysis over a 3-year follow-up [83], although protocol biopsies were not performed and no data regarding fibrosis scores and virological parameters was available. However, recipients of HCV<sup>+</sup> grafts from older donors have higher rates of death and graft failure, and develop more extensive fibrosis than HCV<sup>-</sup> graft recipients from older donors [35]. Finally, the indiscriminate use of HCV<sup>+</sup> grafts, which constitute approximately 2% to 5% of potential organ pool [84,85], is not recommended as the use of grafts with bridging fibrosis or cirrhosis are unlikely to confer any advantages to a recipient [83].

### *Hepatitis B*

Two to 15% of liver donors are anti-HBc positive. The proportion of positive anti-HBc livers in donors >60 years may rise to 25% [86]. The transmission rate of HBV infection to HBV-negative recipients through this route has been reported to be 17–94% without prophylaxis [87–95]. The use of hepatitis B immune globulin (HBIG), with or without lamivudine, is now used to prevent recurrence of HBV in the recipient as well as transmission from donor to recipient in cases of donor anti-HBc positivity [96]. The 5-year patient and graft survival rate in recipients of anti-HBc positive livers who received dual HBV prophylaxis with HBIG and lamivudine has been reported to be significantly higher than for patients who received single prophylaxis or no prophylaxis [83]. Anti-HBc positive donor livers must be directed selectively first to HBsAg positive recipients – as they will require

life-long HBIG anyway. Secondly, these livers should be directed to anti-HBs positive patients—as they do not seem to require HBIG. It is not clear whether or not to treat anti-HBs negative, anti-HBc positive patients with HBIG. Finally, HBV-negative recipients should only receive these livers in case of critical conditions. Life-long HBIG is mandatory [97]. Given the very costly immunoprophylaxis therapy, there are recommendations for the use of such donors in order to obtain the most justified economic approach. In view of this, serology has been declared to be an insufficient tool to guide the therapy, and determination of donor HBV-DNA status is suggested mandatory at the time of transplantation to allow safe and efficacious use of anti-HBc positive livers. Combined HBIG and lamivudine prophylactic therapy is thus recommended when, at least, donor or recipient is HBV-DNA positive. Lamivudine therapy alone is recommended when donor and recipient are both HBV-DNA negative. If the recipient is HBsAg negative but anti-HBs positive, no prophylaxis is recommended. When HBV-DNA is not available, lamivudine is administered when the recipient is HBsAg and anti-HBs negative [98]. However, if no virological testing is available, long-term immunoprophylaxis is necessary to avoid *de novo* infection [98].

#### *Intensive care unit (ICU) stay and bacteraemia*

Donors with a prolonged ICU stay are at increased risk of infection. A multivariate analysis of the results of microbiologic cultures obtained before and at harvesting from 610 consecutive liver donors has shown an ICU stay of  $\geq 3$  days to be the only significant donor characteristic to predict donor infection [99]. Therefore, adequate donor maintenance and careful microbiologic surveillance and treatment, especially of elderly donors, may limit transmission of donor infection. Most of the larger series investigating the bacteraemic donors suggest that livers procured from bacteraemic donors are likely to function well and pose little if any increased risk to the recipient, provided that the recipient is treated with antibacterial agents active against the donor bacterial isolate [100–103]. However, there is no controlled trial indicating the optimal duration of antibacterial treatment for recipients of organs from bacteraemic donors. Five to 7 days of appropriate therapy seems to be the most frequently cited regime [104].

#### *Malignancy*

A survey of UNOS Tumour Registry data has demonstrated extremely low rates of donor cancer transmission through organ transplantation. Among 31986 liver transplants from 1994 through 2001, there are only 7 cases of tumour transmissions (0.02%), although with a high mortality of 57% [105]. There has been a consensus that melanoma, choriocarcinoma, and lung cancer are associated with extremely high

transmission rate and subsequent mortality and therefore should be considered absolute contraindications to organ donation [105]. Data on central nervous system (CNS) tumours has been debating [106–108]. Current consensus is that certain histologic types of CNS tumours such as glioblastoma multiforme and medulloblastoma, along with clinical history of ventricular shunting, major craniotomy, and/or extensive radiation increase the risk of transmission [105].

#### *Ischemia*

Cold and warm ischemia times have been identified as independent risk factors for mortality; they should be minimized to also mitigate unfavourable donor characteristics. An ELTR analysis of 34664 primary adult liver transplants has identified a total ischemia time  $> 13$  hours to be associated with significantly increased mortality at 3- and 12-months post-transplantation [4]. As a previous ELTR analysis had identified a cut-off of 12 hours [109], the current recommendation is to try to keep total ischemia time below 12 hours although the precise threshold for improved outcome is unclear [4]. Programs using significant numbers of EDC livers should consider using the piggyback technique for all cases to minimize warm ischemia time [10,96,110]. Organ procurement and/or allocation from non-heart-beating donors (NHBD) is prohibited according to the German law on transplantation [111].

#### **Conclusion**

Systematic liberalization of graft acceptance criteria provides an immediate expansion of the donor pool with acceptable graft and patient survival. However, risk factors for poor outcome should be identified and avoided in order to avoid “futile transplants”. There is no age limit to be an organ donor. However, recipients with hepatitis C should not, when feasible, receive grafts from very old donors. Grafts with moderate macrovesicular steatosis (30–60%) may be utilized in the absence of additional risk factors in the donor or recipient; livers with more than 60% macrosteatosis should probably be excluded. Donor hepatitis C virus (HCV) status does not impact on graft or patient survival after liver transplantation for HCV+ recipients. The use of hepatitis B virus (HBV) immune globulin (HBIG), with or without lamivudine, is used to prevent HBV transmission from donor to recipient in cases of donor anti-HBc positivity. Adequate donor maintenance and careful microbiologic surveillance and treatment of donors with a prolonged ICU stay is necessary. History of melanoma, choriocarcinoma, and lung cancer precludes organ donation. History of glioblastoma multiforme and medulloblastoma in donors also increase the risk of transmission to the recipient. In order to optimize effective utilization of EDC, a careful consideration of recipient outcome with these organs and a careful matching of the most

appropriate graft-recipient pair should be made while trying to keep cold and warm ischemia times as short as possible and prompting to perform a retransplantation when necessary.

*Acknowledgements.* The authors thank Carl-Ludwig Fischer-Fröhlich and Erich Frey, Deutsche Stiftung Organ-transplantation (DSO) for their administrative assistance and Genevieve Dei-Anane for editing the manuscript.

*Conflict of interest statement.* None declared.

## References

- Annual Report of the US Scientific Registry for Organ Transplantation and the Organ Procurement and Transplantation Network. Transplant Data: 1990-1999. UNOS, Richmond, VA, and the Division of Transplantation, Bureau of Health Resources and Services Administration, US Department of Health and Human Services, Rockville, MD, 2000.
- Bundesärztekammer [German Medical Association]: Richtlinien zur Organtransplantation nach §16 TPG, Aenderung; Deutsches Aerzteblatt, 101 (2004): A246-A247. (<http://www.bundesaerztekammer.de/30/Richtlinien/Richtidx/Organ/organtransplantation.pdf>).
- Busutil RW, Tanaka K. The utility of marginal donors in liver transplantation. *Liver Transpl* 2003; 9: 651-663
- Burroughs AK, Sabin CA, Rolles K *et al.* European Liver Transplant Association. 3-month and 12-month mortality after first liver transplant in adults in Europe: predictive models for outcome. *Lancet* 2006; 367: 225-232
- Briceno J, Solorzano G, Pera C. A proposal for scoring marginal liver grafts. *Transpl Int* 2000; 13 [Suppl 1]: S249-S252
- Pokorny H, Langer F, Herkner H *et al.* Influence of cumulative number of marginal donor criteria on primary organ dysfunction in liver recipients. *Clin Transplant* 2005; 19: 532-536
- Fischer-Fröhlich CL, Lauchart W. Expanded Criteria Liver Donors (ECD): Effect of Cumulative Risks. *Ann Transplant* 2006; 2: 52-56
- Feng S, Goodrich NP, Bragg-Gresham JL *et al.* Characteristics associated with liver graft failure: the concept of a donor risk index. *Am J Transplant* 2006; 6: 783-790
- Busutil RW, Farmer DG, Yersiz H *et al.* Analysis of long-term outcomes of 3200 liver transplantations over two decades: a single-center experience. *Ann Surg* 2005; 241: 905-916
- Tector AJ, Mangus RS, Chestovich P *et al.* Use of extended criteria livers decreases wait time for liver transplantation without adversely impacting posttransplant survival. *Ann Surg* 2006; 244: 439-450
- OPTN: Organ Procurement and Transplantation Network; <http://www.optn.org>. Accessed December 1st, 2006.
- Adam R, McMaster P, O'Grady JG *et al.* European Liver Transplant Association. Evolution of liver transplantation in Europe: report of the European Liver Transplant Registry. *Liver Transpl* 2003; 9: 1231-1243
- Mutimer DJ, Gunson B, Chen J *et al.* Impact of donor age and year of transplantation on graft and patient survival following liver transplantation for hepatitis C virus. *Transplantation* 2006; 81: 7-14
- Lopez-Navidad A, Caballero F. Extended criteria for organ acceptance. Strategies for achieving organ safety and for increasing organ pool. *Clin Transplant* 2003; 17: 308-324
- Zeeh J, Platt D. The aging liver: structural and functional changes and their consequences for drug treatment in old age. *Gerontology* 2002; 48: 121-127
- Briceno J, Marchal T, Padillo J, Solorzano G, Pera C. Influence of marginal donors on liver preservation injury. *Transplantation* 2002; 74: 522-526
- Jimenez Romero C, Moreno Gonzalez E *et al.* Use of octogenarian livers safely expands the donor pool. *Transplantation* 1999; 68: 572-575
- Washburn WK, Johnson LB, Lewis WD, Jenkins RL. Graft function and outcome of older (> or = 60 years) donor livers. *Transplantation* 1996; 61: 1062-1066
- Emre S, Schwartz ME, Altaca G *et al.* Safe use of hepatic allografts from donors older than 70 years. *Transplantation* 1996; 62: 62-65
- Nardo B, Masetti M, Urbani L *et al.* Liver transplantation from donors aged 80 years and over: pushing the limit. *Am J Transplant* 2004; 4: 1139-1147
- Wakabayashi H, Nishiyama Y, Ushiyama T, Maeba T, Maeta H. Evaluation of the effect of age on functioning hepatocyte mass and liver blood flow using liver scintigraphy in preoperative estimations for surgical patients: comparison with CT volumetry. *J Surg Res* 2002; 106: 246-253
- Busquets J, Xiol X, Figueras J *et al.* The impact of donor age on liver transplantation: influence of donor age on early liver function and on subsequent patient and graft survival. *Transplantation* 2001; 71: 1765-1771
- Grazi GL, Cescon M, Ravaioli M *et al.* A revised consideration on the use of very aged donors for liver transplantation. *Am J Transplant* 2001; 1: 61-68
- Detry O, Bonnet P, Honore P, Meurisse M, Jacquet N. What is the risk of transferral of an undetected neoplasm during organ transplantation? *Transplant Proc* 1997; 29: 2410-2411
- Healey PJ, Davis CL. Transmission of tumours by transplantation. *Lancet* 1998; 352: 2-3
- Rifai K, Sebah M, Karam V *et al.* Donor age influences 10-year liver graft histology independently of hepatitis C virus infection. *J Hepatol* 2004; 41: 446-453
- Showstack J, Katz PP, Lake JR *et al.* Resource utilization in liver transplantation: effects of patient characteristics and clinical practice. NIDDK Liver Transplantation Database Group. *JAMA* 1999; 281: 1381-1386
- Neipp M, Bektas H, Lueck R *et al.* Liver transplantation using organs from donors older than 60 years. *Transpl Int* 2004; 17: 416-423
- DeBakey ME, Lawrie GM, Glaeser DH. Patterns of atherosclerosis and their surgical significance. *Ann Surg* 1985; 201: 115-131
- Wall WJ, Mimeault R, Grant DR, Bloch M. The use of older donor livers for hepatic transplantation. *Transplantation* 1990; 49: 377-381
- Moore DE, Feurer ID, Speroff T *et al.* Impact of donor, technical, and recipient risk factors on survival and quality of life after liver transplantation. *Arch Surg* 2005; 140: 273-277
- Markmann JF, Markmann JW, Markmann DA *et al.* Preoperative factors associated with outcome and their impact on resource use in 1148 consecutive primary liver transplants. *Transplantation* 2001; 72: 1113-1122
- Wali M, Harrison RF, Gow PJ, Mutimer D. Advancing donor liver age and rapid fibrosis progression following transplantation for hepatitis C. *Gut* 2002; 51: 248-252
- Berenguer M, Prieto M, San Juan F *et al.* Contribution of donor age to the recent decrease in patient survival among HCV-infected liver transplant recipients. *Hepatology* 2002; 36: 202-210
- Khapra AP, Agarwal K, Fiel MI *et al.* Impact of donor age on survival and fibrosis progression in patients with hepatitis C undergoing liver transplantation using HCV+ allografts. *Liver Transpl* 2006; 12: 1496-1503
- Alonso O, Loinaz C, Moreno E *et al.* Advanced donor age increases the risk of severe recurrent hepatitis C after liver transplantation. *Transpl Int* 2005; 18: 902-907

37. Condrón SL, Heneghan MA, Patel K, Dev A, McHutchison JG, Muir AJ. Effect of donor age on survival of liver transplant recipients with hepatitis C virus infection. *Transplantation* 2005; 80: 145–148
38. Testa G, Goldstein RM, Netto G *et al.* Long-term outcome of patients transplanted with livers from hepatitis C-positive donors. *Transplantation* 1998; 65: 925–929
39. Samonakis DN, Triantos CK, Thalheimer U *et al.* Immunosuppression and donor age with respect to severity of HCV recurrence after liver transplantation. *Liver Transpl* 2005; 11: 386–395
40. Lake JR, Shorr JS, Steffen BJ, Chu AH, Gordon RD, Wiesner RH. Differential effects of donor age in liver transplant recipients infected with hepatitis B, hepatitis C and without viral hepatitis. *Am J Transplant* 2005; 5: 549–557
41. Neumann UP, Berg T, Bahra M *et al.* Long-term outcome of liver transplants for chronic hepatitis C: a 10-year follow-up. *Transplantation* 2004; 77: 226–231
42. Aikata H, Takaishi H, Kawakami Y *et al.* Telomere reduction in human liver tissues with age and chronic inflammation. *Exp Cell Res* 2000; 256: 578–582
43. Gadaleta MN, Cormio A, Pesce V, Lezza AM, Cantatore P. Aging and mitochondria. *Biochimie* 1998; 80: 863–970
44. Ploeg RJ, D'lessandro AM, Knechtle SJ *et al.* Risk factors for primary dysfunction after liver transplantation—multivariate analysis. *Transplantation* 1993; 55: 807–813
45. Adam R, Sanchez C, Astarcioglu I, Bismuth H. Deleterious effect of extended cold ischemia time on the posttransplant outcome of aged livers. *Transplant Proc* 1995; 27: 1181–1183
46. Strasberg SM, Howard TK, Molmenti EP, Hertl M. Selecting the donor liver: risk factors for poor function after orthotopic liver transplantation. *Hepatology* 1994; 20: 829–838
47. Renz JF, Kin C, Kinkhabwala M *et al.* Utilization of extended donor criteria liver allografts maximizes donor use and patient access to liver transplantation. *Ann Surg* 2005; 242: 556–563
48. Busuttil RW, Tanaka K. The utility of marginal donors in liver transplantation. *Liver Transpl* 2003; 9: 651–663
49. Angulo P. Nonalcoholic fatty liver disease and liver transplantation. *Liver Transpl* 2006; 12: 523–534
50. Cameron A, Busuttil RW. AASLD/ILTS transplant course: is there an extended donor suitable for everyone? *Liver Transpl* 2005; 11[Suppl 2]: S2–S5
51. Marsman WA, Wiesner RH, Rodriguez L *et al.* Use of fatty donor liver is associated with diminished early patient and graft survival. *Transplantation* 1996; 62: 1246–1251
52. Chavin KD, Yang S, Lin HZ *et al.* Obesity induces expression of uncoupling protein-2 in hepatocytes and promotes liver ATP depletion. *J Biol Chem* 1999; 274: 5692–5700
53. Cortez-Pinto H, Zhi Lin H, Qi Yang S, Odwin Da Costa S, Diehl AM. Lipids up-regulate uncoupling protein 2 expression in rat hepatocytes. *Gastroenterology* 1999; 116: 1184–1193
54. Cisneros C, Guillen F, Gomez R *et al.* Analysis of warm ischemia time for prediction of primary nonfunction of the hepatic graft. *Transplant Proc* 1991; 23: 1976
55. Fukumori T, Ohkohchi N, Tsukamoto S, Satomi S. The mechanism of injury in a steatotic liver graft during cold preservation. *Transplantation* 1999; 67: 195–200
56. Hui AM, Kawasaki S, Makuuchi M, Nakayama J, Ikegami T, Miyagawa S. Liver injury following normothermic ischemia in steatotic rat liver. *Hepatology* 1994; 20: 1287–1293
57. Todo S, Demetris AJ, Makowka L *et al.* Primary nonfunction of hepatic allografts with preexisting fatty infiltration. *Transplantation* 1989; 47: 903–905
58. Wada K, Fujimoto K, Fujikawa Y, Shibayama Y, Mitsui H, Nakata K. @Sinusoidal stenosis as the cause of portal hypertension in choline deficient diet induced fatty cirrhosis of the rat liver. *Acta Pathol Jpn* 1974; 24: 207–217.
59. Letteron P, Fromenty B, Terris B, Degott C, Pessayre D. Acute and chronic hepatic steatosis lead to in vivo lipid peroxidation in mice. *J Hepatol* 1996; 24: 200–208
60. Laight DW, Desai KM, Gopaul NK, Anggard EE, Carrier MJ. F2-isoprostane evidence of oxidant stress in the insulin resistant, obese Zucker rat: effects of vitamin E. *Eur J Pharmacol* 1999; 377: 89–92
61. Soltys K, Dikdan G, Koneru B. Oxidative stress in fatty livers of obese Zucker rats: rapid amelioration and improved tolerance to warm ischemia with tocopherol. *Hepatology* 2001; 34: 13–18
62. Franzen LE, Ekstedt M, Kechagias S, Bodin L. Semiquantitative evaluation overestimates the degree of steatosis in liver biopsies: a comparison to stereological point counting. *Mod Pathol* 2005; 18: 912–916
63. Urena MA, Moreno Gonzalez E, Romero CJ, Ruiz-Delgado FC, Moreno Sanz C. An approach to the rational use of steatotic donor livers in liver transplantation. *Hepatogastroenterology* 1999; 46: 1164–1173
64. Selzner M, Clavien PA. Fatty liver in liver transplantation and surgery. *Semin Liver Dis* 2001; 21: 105–113
65. Urena MA, Ruiz-Delgado FC, Gonzalez EM *et al.* Assessing risk of the use of livers with macro and microsteatosis in a liver transplant program. *Transplant Proc* 1998; 30: 3288–3291
66. Cameron AM, Ghobrial RM, Yersiz H *et al.* Optimal utilization of donor grafts with extended criteria: a single-center experience in over 1000 liver transplants. *Ann Surg* 2006; 243: 748–753
67. Ryan CK, Johnson LA, Germin BI, Marcos A. One hundred consecutive hepatic biopsies in the workup of living donors for right lobe liver transplantation. *Liver Transpl* 2002; 8: 1114–1122
68. Park SH, Kim PN, Kim KW *et al.* Macrovesicular hepatic steatosis in living liver donors: use of CT for quantitative and qualitative assessment. *Radiology* 2006; 239: 105–112
69. Kim SH, Lee JM, Han JK *et al.* Hepatic macrosteatosis: predicting appropriateness of liver donation by using MR imaging—correlation with histopathologic findings. *Radiology* 2006; 240: 116–129
70. Fiorini RN, Kirtz J, Periyasamy B *et al.* Development of an unbiased method for the estimation of liver steatosis. *Clin Transplant* 2004; 18: 700–706
71. Schemmer P, Schoonhoven R, Swenberg JA *et al.* Gentle organ manipulation during harvest as a key determinant of survival of fatty livers after transplantation in the rat. *Transpl Int* 1999; 12: 351–359
72. Fukumori T, Ohkohchi N, Tsukamoto S, Satomi S. Why is a liver with steatosis susceptible to cold ischemic injury? *Transplant Proc* 1999; 31: 548–549
73. Briceno J, Padillo J, Rufian S, Solorzano G, Pera C. Assignment of steatotic livers by the Mayo model for end-stage liver disease. *Transpl Int* 2005; 18: 577–583
74. Salizzoni M, Franchello A, Zamboni F *et al.* Marginal grafts: finding the correct treatment for fatty livers. *Transpl Int* 2003; 16: 486–493
75. De Carlis L, Colella G, Sansalone CV *et al.* Marginal donors in liver transplantation: the role of donor age. *Transplant Proc* 1999; 31: 397–400
76. Verran D, Kusyk T, Painter D *et al.* Clinical experience gained from the use of 120 steatotic donor livers for orthotopic liver transplantation. *Liver Transpl* 2003; 9: 500–505
77. D'Alessandro AM, Kalayoglu M, Sollinger HW *et al.* The predictive value of donor liver biopsies for the development of primary nonfunction after orthotopic liver transplantation. *Transplantation* 1991; 51: 157–163
78. Burke A, Lucey MR. Non-alcoholic fatty liver disease, non-alcoholic steatohepatitis and orthotopic liver transplantation. *Am J Transplant* 2004; 4: 686–693
79. Husberg BS, Genyk YS, Klintmalm GB. A new rat model for studies of the ischemic injury after transplantation of fatty livers: improvement after postoperative administration of prostaglandin. *Transplantation* 1994; 57: 457–458
80. Marroquin CE, Marino G, Kuo PC *et al.* Transplantation of hepatitis C-positive livers in hepatitis C-positive patients is equivalent to transplanting hepatitis C-negative livers. *Liver Transpl* 2001; 7: 762–768

81. Vargas HE, Laskus T, Wang LF *et al.* Outcome of liver transplantation in hepatitis C virus-infected patients who received hepatitis C virus-infected grafts. *Gastroenterology* 1999; 117: 149–153
82. A 10-year experience of liver transplantation for hepatitis C: analysis of factors determining outcome in over 500 patients. *Ann Surg* 2001; 234: 384
83. Saab S, Ghobrial RM, Ibrahim AB *et al.* positive grafts may be used in orthotopic liver transplantation: a matched analysis. *Am J Transplant* 2003; 3: 1167–1172
84. Pereira BJ, Wright TL, Schmid CH, Levey AS. A controlled study of hepatitis C transmission by organ transplantation. The New England Organ Bank Hepatitis C Study Group. *Lancet* 1995; 345: 484–487
85. Candinas D, Joller-Jemelka HI, Schlumpf R *et al.* RNA prevalence in a Western European organ donor pool and virus transmission by organ transplantation. *J Med Microbiol* 1994; 41: 220–223
86. Prieto M, Gomez MD, Berenguer M *et al.* De novo hepatitis B after liver transplantation from hepatitis B core antibody-positive donors in an area with high prevalence of anti-HBc positivity in the donor population. *Liver Transpl* 2001; 7: 51–58
87. Grob P, Jilg W, Bornhak H *et al.* Serological pattern 'anti-HBc alone': report on a workshop. *J Med Virol* 2000; 62: 450–455
88. Jilg W, Sieger E, Zachoval R, Schatzl H. Individuals with antibodies against hepatitis B core antigen as the only serological marker for hepatitis B infection: high percentage of carriers of hepatitis B and C virus. *J Hepatol* 1995; 23: 14–20
89. Dodson SF, Issa S, Araya V *et al.* Infectivity of hepatic allografts with antibodies to hepatitis B virus. *Transplantation* 1997; 64: 1582–1584
90. Anselmo DM, Ghobrial RM, Jung LC *et al.* New era of liver transplantation for hepatitis B: a 17-year single-center experience. *Ann Surg* 2002; 235: 611–619
91. Douglas DD, Rakela J, Wright TL, Krom RA, Wiesner RH. The clinical course of transplantation-associated de novo hepatitis B infection in the liver transplant recipient. *Liver Transpl Surg* 1997; 3: 105–111
92. Uemoto S, Inomata Y, Sannomiya A *et al.* Posttransplant hepatitis B infection in liver transplantation with hepatitis B core antibody-positive donors. *Transplant Proc* 1998; 30: 134–135
93. Castells L, Vargas V, Rodriguez-Frias F *et al.* Transmission of hepatitis B virus by transplantation of livers from donors positive for antibody to hepatitis B core antigen. *Transplant Proc* 1999; 31: 2464–2465
94. Boyacioglu S, Arslan H, Demirhan B, Gur G, Turan M, Haberal M. Is there risk of transmitting hepatitis B virus in accepting hepatitis B core antibody-positive donors for living related liver transplantation? *Transplant Proc* 2001; 33: 2802–2803
95. Use of hepatitis B core antibody-positive donors in orthotopic liver transplantation. *Arch Surg* 2002; 137: 572
96. Mieth M, Schemmer P, Encke J *et al.* Heidelberg Manual der Lebertransplantation. *Universitätsklinikum Heidelberg*, 2nd Edition 2006; ISBN 3-9808751-1-3
97. Donataccio D, Roggen F, De Reyck C, Verbaandert C, Bodeus M, Lerut J. Use of anti-HBc positive allografts in adult liver transplantation: toward a safer way to expand the donor pool. *Transpl Int* 2006; 19: 38–43
98. Nery JR, Nery-Avila C, Reddy KR *et al.* Use of liver grafts from donors positive for antihepatitis B-core antibody in the era of prophylaxis with hepatitis-B immunoglobulin and lamivudine. *Transplantation* 2003; 75: 1179–1186
99. Cerutti E, Stratta C, Romagnoli R *et al.* Bacterial- and fungal-positive cultures in organ donors: clinical impact in liver transplantation. *Liver Transpl* 2006; 12: 1253–1259
100. Little D, Farrell J, Cunningham P, Hickey DP. Donor sepsis is not a contraindication to cadaveric organ donation. *Q J Med* 1997; 90: 641–642
101. Lumbreras C, Sanz F, Gonzalez A *et al.* Clinical significance of donor-unrecognized bacteremia in the outcome of solid-organ transplant recipients. *Clin Infect Dis* 2001; 33: 722–726
102. Freeman RB, Giatras I, Falagas ME *et al.* Outcome of transplantation of organs procured from bacteremic donors. *Transplantation* 1999; 68: 1107–1111
103. Zibari G, Lipka J, Zizzi A, Abreo K, Jacobbi L, McDonald J. The use of contaminated donor organs in transplantation. *Clin Transpl* 2000; 14: 397–400
104. Angelis M, Cooper JT, Freeman RB. Impact of donor infections on outcome of orthotopic liver transplantation. *Liver Transpl* 2003; 9: 451–462
105. Feng S, Buell JF, Chari RS, DiMaio JM, Hanto DW. Tumors and transplantation: The 2003 Third Annual ASTS State-of-the-Art Winter Symposium. *Am J Transplant* 2003; 3: 1481–1467
106. Kauffman HM. The United Network for Organ Sharing position on using donors with primary central nervous system malignancies. *Transplantation* 2005; 79: 622–623
107. Buell JF, Beebe TM, Trofe J *et al.* Donor transmitted malignancies. *Ann Transplant* 2004; 9: 53–56
108. Buell JF, Trofe J, Sethuraman G *et al.* Donors with central nervous system malignancies: are they truly safe? *Transplantation* 2003; 76: 340–343
109. Adam R, Cailliez V, Majno P *et al.* Normalised intrinsic mortality risk in liver transplantation: European Liver Transplant Registry study. *Lancet* 2000; 356: 621–627
110. Tzakis A, Todo S, Starzl TE. Orthotopic liver transplantation with preservation of the inferior vena cava. *Ann Surg* 1989; 210: 649–452
111. ET Liver Allocation System (ELAS), Eurotransplant Manual © –version April 28th, 2005 - subject to change.
